# Supplementary material for: Sialyl LewisX/A and Cytokeratin Crosstalk in Triple Negative Breast Cancer
Source: MDPI journal article supplement (doi:10.3390/cancers15030731), 2023-01-25
Supplement: s1 [file s1]

## Supplementary File S1

**A**

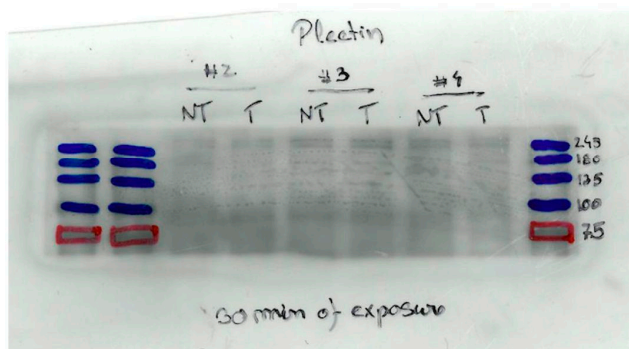

**B**

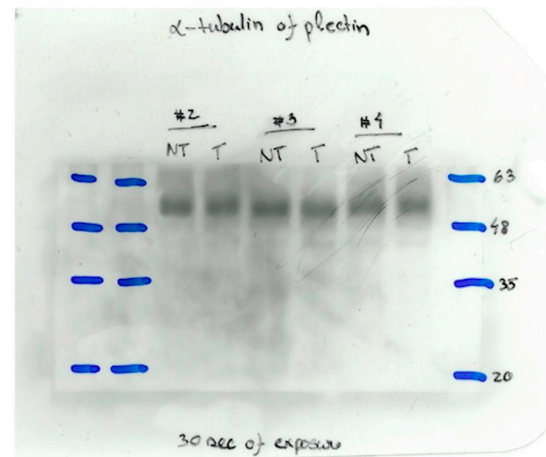

Whole Western blot films showing all bands and molecular weight markers of (A) plectin staining and (B)  $\alpha$ -tubulin staining. Lanes #2, #3 and #4 correspond to n=1, n=2 and n=3, respectively. Legend: NT - Not treated; T - Treated (with 2-FF).
