# Supplementary material for: Sialyl LewisX/A and Cytokeratin Crosstalk in Triple Negative Breast Cancer
Source: MDPI journal article supplement (doi:10.3390/cancers15030731), 2023-01-25
Supplement: s1 [file s1]

# Supplementary File S1

**Table S1.** Patients’ and tumours’ characteristics of the TNBC cohort of this study.

| TNBC ( <i>n</i> = 50)    |  |     |
|--------------------------|--|-----|
| Age at diagnosis (years) |  |     |
| Median                   |  | 64  |
| Min                      |  | 33  |
| Max                      |  | 89  |
| Grade (% of cases)       |  |     |
| I                        |  | 16% |
| II                       |  | 26% |
| III                      |  | 56% |
| IV                       |  | 2%  |
| Tumour size (mm)         |  |     |
| Median                   |  | 15  |
| Min                      |  | 2   |
| Max                      |  | 70  |
| # of invaded lymph nodes |  |     |
| Median                   |  | 12  |
| Min                      |  | 1   |
| Max                      |  | 25  |

**Table S2.** List of retrieved sLe<sup>X/A</sup> proteins immunoprecipitated from the CF1\_T breast cancer cell line based on a label-free quantification of glycoproteins by mass spectrometry (as reported by Carrascal et al 2018 and their reported association with Cytokeratin 5/6. The association of each protein with cytokeratin 5/6 genes is annotated according to the STRING database for protein-protein interactions (Szklarczyk et al. Nucleic acids research 47.D1 (2018): D607-D613.2). When there is a positive association, STRING combined scores are annotated. \*The combined score refers to the value of interaction between Cytokeratin 5 and sLe<sup>X/A</sup> proteins. It accounts for co-expression, experimental/biochemical data, association in curated databases and co-mention in PubMed abstracts. This interaction is highlighted in the picture by a binding string. Proteins are presented by highest to lower combined scores.

| Entry  | Entry name   | Protein names                                                                                                                                                                                                                                                                                      | Positive association with cy-tokeratin                                               | Combined Score* |
|--------|--------------|----------------------------------------------------------------------------------------------------------------------------------------------------------------------------------------------------------------------------------------------------------------------------------------------------|--------------------------------------------------------------------------------------|-----------------|
| P23229 | ITA6_HUMAN   | Integrin alpha-6 (CD49 antigen-like family member F) (VLA-6) (CD antigen CD49f) [Cleaved into: Integrin alpha-6 heavy chain; Integrin alpha-6 light chain; Processed integrin alpha-6 (Alpha6p)]                                                                                                   | 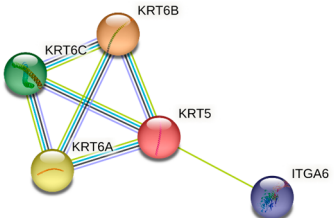   | 0.658           |
| P16070 | CD44_HUMAN   | CD44 antigen (CDw44) (Epican) (Extracellular matrix receptor III) (ECMR-III) (GP90 lymphocyte homing/adhesion receptor) (HUTCH-I) (Heparan sulfate proteoglycan) (Hermes antigen) (Hyaluronate receptor) (Phagocytic glycoprotein 1) (PGP-1) (Phagocytic glycoprotein I) (PGP-I) (CD antigen CD44) |    | 0.616           |
| O60716 | CTNND1_HUMAN | Catenin delta-1 (Cadherin-associated Src substrate) (CAS) (p120 catenin) (p120(ctn)) (p120(cas))                                                                                                                                                                                                   |   | 0.554           |
| P35613 | BASI_HUMAN   | Basigin (5F7) (Collagenase stimulatory factor) (Extracellular matrix metalloproteinase inducer) (EMMPRIN) (Leukocyte activation antigen M6) (OK blood group antigen) (Tumor cell-derived collagenase stimulatory factor) (TCSF) (CD antigen CD147)                                                 |  | N/A             |
| P15144 | AMPN_HUMAN   | Aminopeptidase N (AP-N) (hAPN) (EC 3.4.11.2) (Alanyl aminopeptidase) (Aminopeptidase M) (AP-M) (Microsomal aminopeptidase) (Myeloid plasma membrane glycoprotein CD13) (gp150) (CD antigen CD13)                                                                                                   |  | N/A             |
| P05556 | ITB1_HUMAN   | Integrin beta-1 (Fibronectin receptor subunit beta) (Glycoprotein IIa) (GPIIA) (VLA-4 subunit beta) (CD antigen CD29)                                                                                                                                                                              |  | N/A             |

|        |             |                                                                                                                                                                                 |                                                                                      |     |
|--------|-------------|---------------------------------------------------------------------------------------------------------------------------------------------------------------------------------|--------------------------------------------------------------------------------------|-----|
| Q92896 | GSLG1_HUMAN | Golgi apparatus protein 1 (CFR-1)<br>(Cysteine-rich fibroblast growth factor receptor) (E-selectin ligand 1) (ESL-1) (Golgi sialoglycoprotein MG-160)                           | 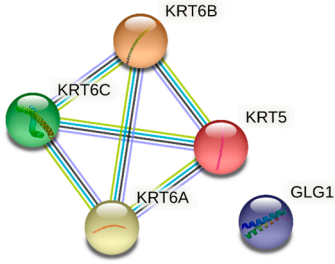   | N/A |
| Q9NZM1 | MYOF_HUMAN  | Myoferlin (Fer-1-like protein 3)                                                                                                                                                |    | N/A |
| O75976 | CBPD_HUMAN  | Carboxypeptidase D (EC 3.4.17.22)<br>(Metalloprotease) (gp180)                                                                                                                  |   | N/A |
| Q13740 | CD166_HUMAN | CD166 antigen (Activated leukocyte cell adhesion molecule) (CD antigen CD166)                                                                                                   |  | N/A |
| P10314 | 1A32_HUMAN  | HLA class I histocompatibility antigen, A-32 alpha chain (MHC class I antigen A*32)                                                                                             |  | N/A |
| Q6UVK1 | CSPG4_HUMAN | Chondroitin sulfate proteoglycan 4<br>(Chondroitin sulfate proteoglycan NG2) (Melanoma chondroitin sulfate proteoglycan) (Melanoma-associated chondroitin sulfate proteoglycan) |  | N/A |

|        |             |                                                                                                                                                                                                 |                                                                                      |     |
|--------|-------------|-------------------------------------------------------------------------------------------------------------------------------------------------------------------------------------------------|--------------------------------------------------------------------------------------|-----|
| O15427 | MOT4_HUMAN  | Monocarboxylate transporter 4 (MCT 4) (Solute carrier family 16 member 3)                                                                                                                       | 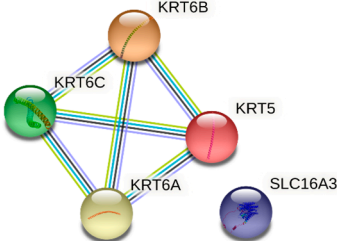   | N/A |
| Q07065 | CKAP4_HUMAN | Cytoskeleton-associated protein 4 (63-kDa cytoskeleton-linking membrane protein) (Climp-63) (p63)                                                                                               |    | N/A |
| P23634 | AT2B4_HUMAN | Plasma membrane calcium-transporting ATPase 4 (PMCA4) (EC 3.6.3.8) (Matrix-remodeling-associated protein 1) (Plasma membrane calcium ATPase isoform 4) (Plasma membrane calcium pump isoform 4) |    | N/A |
| P05023 | AT1A1_HUMAN | Sodium/potassium-transporting ATPase subunit alpha-1 (Na <sup>+</sup> /K <sup>+</sup> ATPase alpha-1 subunit) (EC 3.6.3.9) (Sodium pump subunit alpha-1)                                        |   | N/A |
| Q07954 | LRP1_HUMAN  | Prolow-density lipoprotein receptor-related protein 1 (LRP-1) (Alpha-2-macroglobulin receptor) (A2MR) (Apolipoprotein E receptor) (APOER) (CD antigen CD91)                                     |  | N/A |
| P18084 | ITB5_HUMAN  | Integrin beta-5                                                                                                                                                                                 |  | N/A |
| Q03135 | CAV1_HUMAN  | Caveolin-1                                                                                                                                                                                      |  | N/A |

|        |              |                                                                                                                                         |                                                                                      |     |
|--------|--------------|-----------------------------------------------------------------------------------------------------------------------------------------|--------------------------------------------------------------------------------------|-----|
| Q9UKX5 | ITA11_HUMAN  | Integrin alpha-11                                                                                                                       | 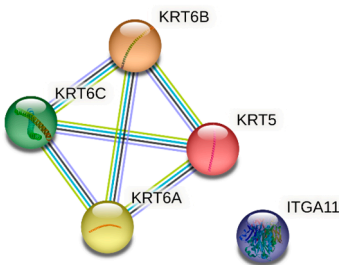   | N/A |
| Q92544 | TM9SF4_HUMAN | Transmembrane 9 superfamily member 4 (Tumor cannibalism associated protein 1)                                                           |    | N/A |
| P26006 | ITA3_HUMAN   | Integrin alpha-3 (CD49 antigen-like family member C) (FRP-2) (Galactoprotein B3) (GAPB3) (VLA-3 subunit alpha) (CD antigen CD49c)       |    | N/A |
| P06756 | ITAV_HUMAN   | Integrin alpha-V (Vitronectin receptor) (Vitronectin receptor subunit alpha) (CD antigen CD51)                                          |   | N/A |
| P08648 | ITA5_HUMAN   | Integrin alpha-5 (CD49 antigen-like family member E) (Fibronectin receptor subunit alpha) (Integrin alpha-F) (VLA-5) (CD antigen CD49e) |  | N/A |
| O14786 | NRP1_HUMAN   | Neuropilin-1 (Vascular endothelial cell growth factor 165 receptor) (CD antigen CD304)                                                  |  | N/A |

|        |             |                                                                                                                                                                                                                           |                                                                                      |     |
|--------|-------------|---------------------------------------------------------------------------------------------------------------------------------------------------------------------------------------------------------------------------|--------------------------------------------------------------------------------------|-----|
| P10321 | 1C07_HUMAN  | HLA class I histocompatibility antigen, Cw-7 alpha chain (MHC class I antigen Cw*7)                                                                                                                                       | 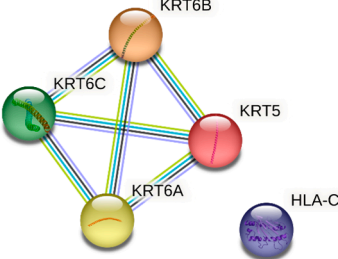   | N/A |
| P05362 | ICAM1_HUMAN | Intercellular adhesion molecule 1 (ICAM-1) (Major group rhinovirus receptor) (CD antigen CD54)                                                                                                                            |    | N/A |
| P22413 | ENPP1_HUMAN | Ectonucleotide pyrophosphatase/phosphodiesterase family member 1 (E-NPP 1) (Membrane component chromosome 6 surface marker 1) (Phosphodiesterase I/nucleotide pyrophosphatase 1) (Plasma-cell membrane glycoprotein PC-1) |   | N/A |
| P35580 | MYH10_HUMAN | Myosin-10 (Cellular myosin heavy chain, type B) (Myosin heavy chain 10) (Myosin heavy chain, non-muscle IIb) (Non-muscle myosin heavy chain B) (NMMHC-B) (Non-muscle myosin heavy chain IIb) (NMMHC II-b) (NMMHC-IIb)     |  | N/A |
| P02786 | TFR1_HUMAN  | Transferrin receptor protein 1 (TR) (TfR) (TfR1) (Trfr) (T9) (p90) (CD antigen CD71)                                                                                                                                      |  | N/A |

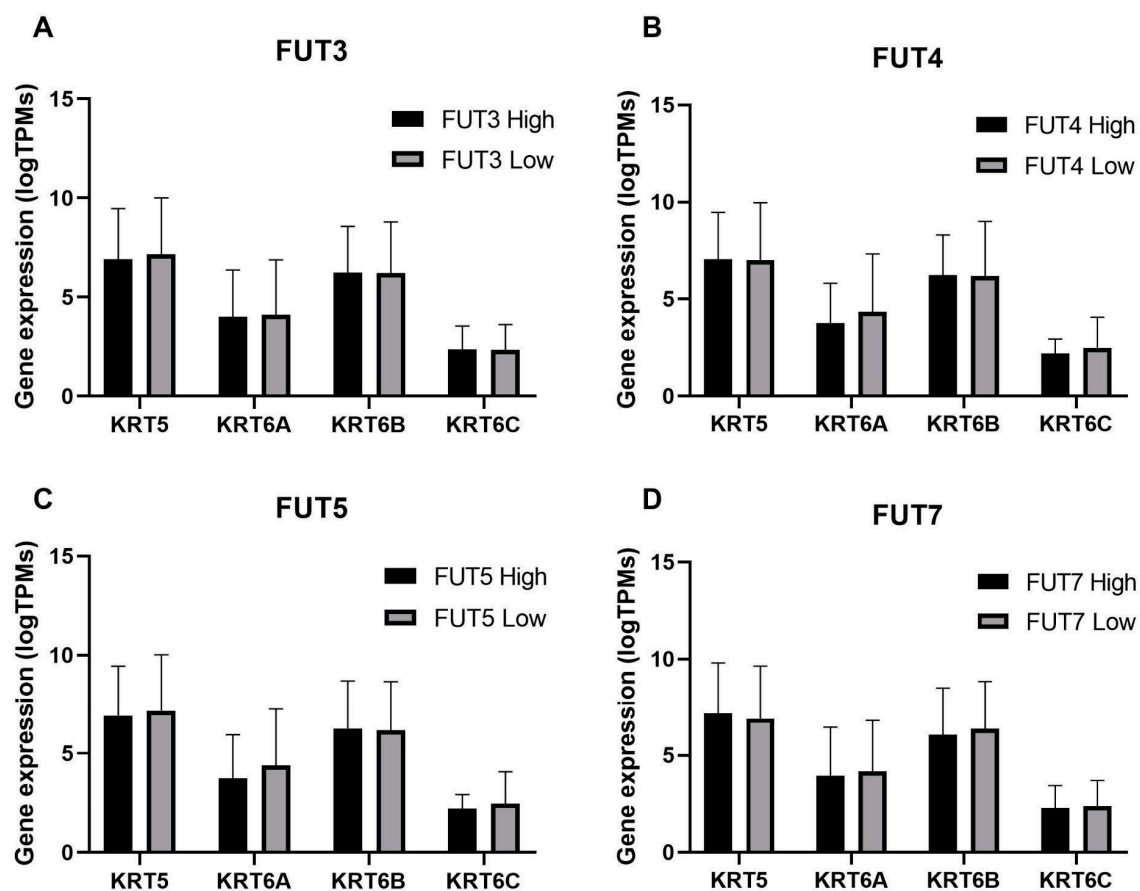

**Figure S1. - CK5/6 genes expression according to the high or low expression of FUTs.** TNBC tissue genetic data from the TCGA database was used to evaluate gene expression. The samples were subdivided based on the median expression of various 1,3-fucosyltransferases (*FUT3*, *FUT4*, *FUT5* and *FUT7*) and correlated with genes involved in cytokeratin production (*KRT5*, *-6A*, *-6B*, *-6C*).



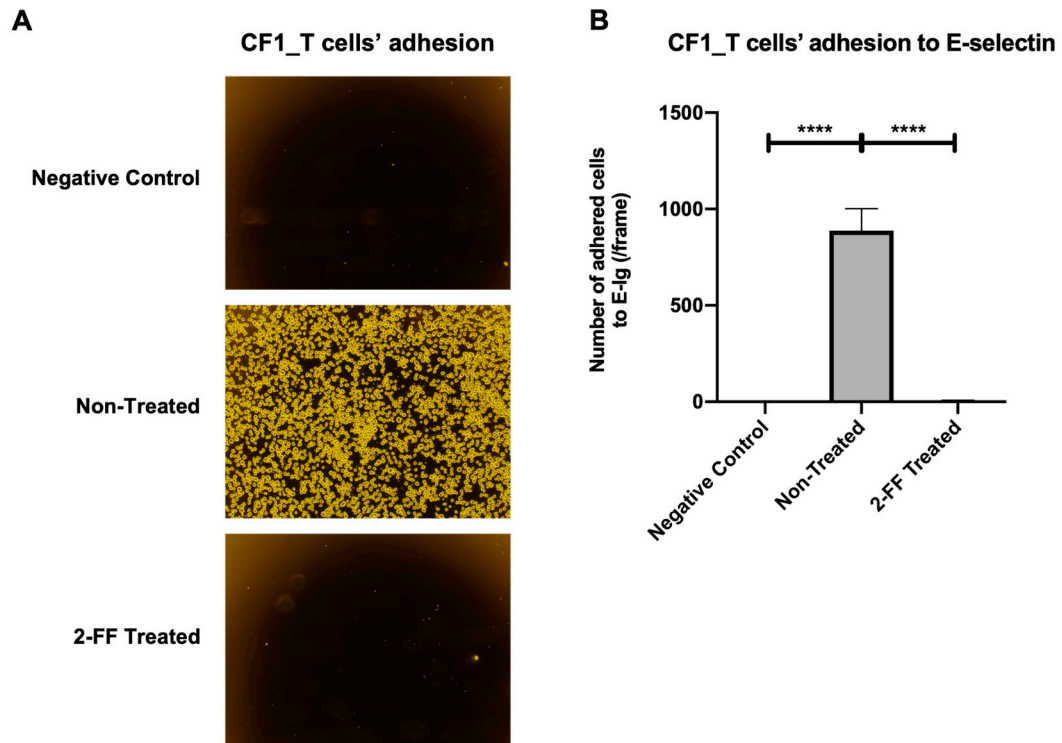

**Figure S2.** CF1\_T cells treated with 2-FF lose the ability to bind E-selectin under flow conditions. (A) CF1\_T were treated or not with 1 mM 2-FF for 5 days and resuspended in Hank's balanced salt solution (HBSS) containing 2 mM CaCl<sub>2</sub> (HBSS-Ca). They were overlaid in glass slides spotted with E-Ig chimaera, previously blocked with 1% BSA. Their ability to bind to E-Ig chimaera was analysed under flow conditions, specifically using an orbital rotation at 80 r.p.m. for 30 min at 4 °C. The slides were immersed in HBSS-Ca to remove the non-adherent cells, and adherent cells were fixed with 3% glutaraldehyde. Assays performed in EDTA buffer were used as negative control. Adherent cells were examined under light microscopy at 100× magnification. The photomicrographic sections are a representative sample of a  $n = 4$ . (B) The number of adherent cells in each photomicrograph was counted using ImageJ software. [ $p < 0.0001$  (\*\*\*\*)].

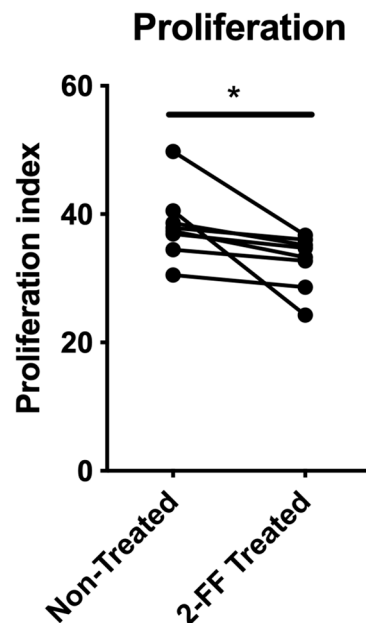

**Figure S3.** Proliferation index of CF1\_T cells treated with 2-fluorofucose (2-FF). CF1\_T cells were treated, or not, with 2-FF, for a total of 14 days. At day 5 of treatment, the cells were stained with CFSE dye and then analysed after another 9 days of treatment (total of 14 days). CFSE dilution was analysed by flow cytometry, and the proliferation index was calculated as the fold expansion of the overall culture using the MODFIT software [ $n = 8$ ;  $p < 0.05$  (\*)].



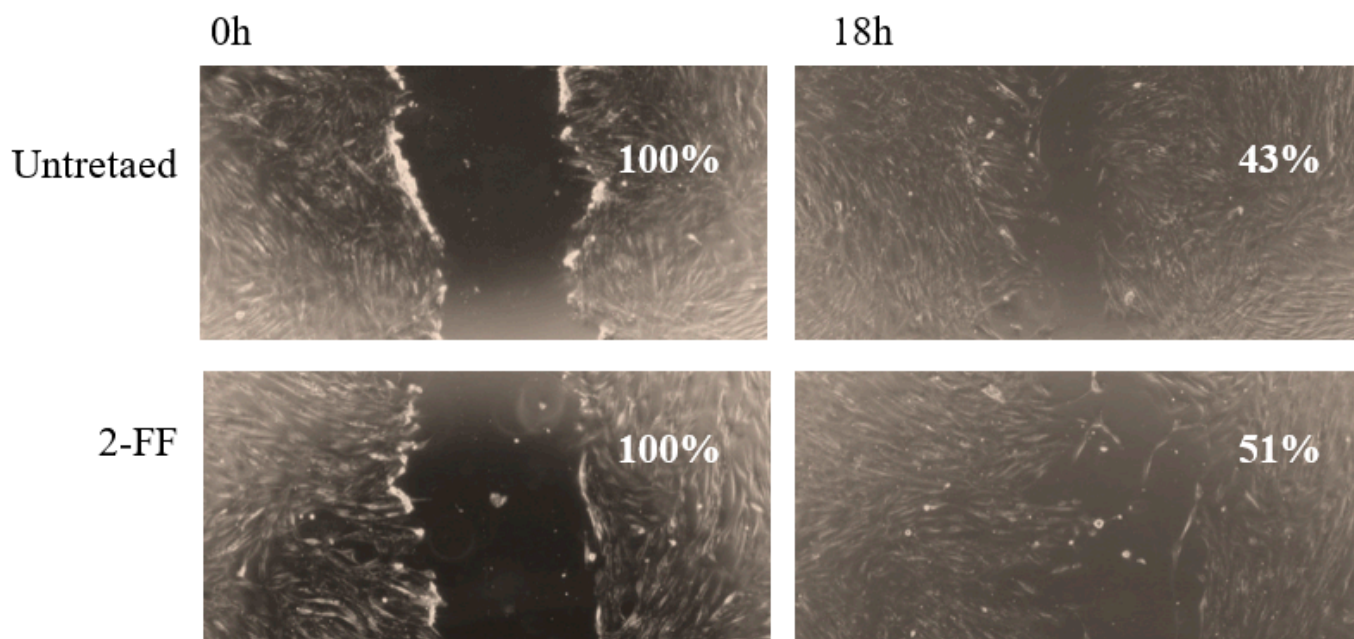

**Figure S4. Migratory ability of CF1\_T cell line after 2-fluorofucose (2-FF) treatment analysed by scratch wound healing assay.** CF1\_T cells were seeded into 12-well microplates and grown to confluence in the presence or absence of 1mM of 2-FF inhibitor. After wounding the monolayer with a pipette tip. The suspended cells and debris were washed away, and fresh medium was added. At 0 and 18 h after wounding, scratched regions were photographed with an inverted microscope equipped with a digital camera. The percentage of wounded area in the photographs is indicated in white. It was measured using ImageJ software and the percentage of the closed area was calculated using the formula:  $((\text{wounded area (18h)}/\text{wounded area (0h)}) * 100) - 100$ ). .

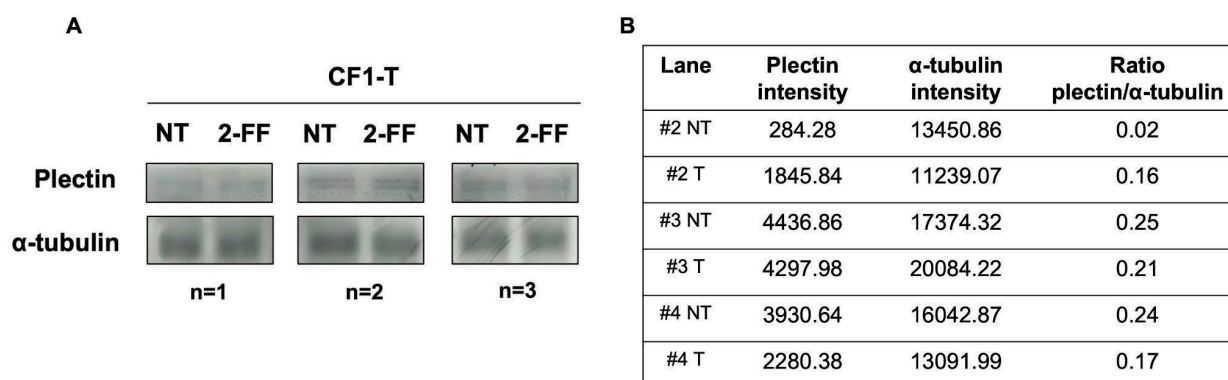

**Figure S5. CF1\_T cell line expresses plectin.** (A) CF1\_T cell lines were treated with 2-FF inhibitor for 5 days and total lysate proteins were stained with α6 integrin antibody and analysed by western blot ( $n = 3$ ). α-tubulin expression was analysed as a loading control. (B) Densitometry readings of Western blot films regarding plectin and α-tubulin bands intensity. The ratios between plectin and α-tubulin intensities are also presented. Whole Western blot membranes are included in Figure 1 of Supporting Information.
